# Supplementary material for: Simultaneous Prediction, Determination, and Extraction of Four Polycyclic Aromatic Hydrocarbons in the Environment Using a UCON–NaH2PO4 Aqueous Two-Phase Extraction System Combined with High-Performance Liquid Chromatography-Ultraviolet Detection
Source: MDPI journal article supplement (doi:10.3390/molecules27196465), 2022-09-30
Supplement: s1 [file s1]

## Supplementary Material

$$Y_{11} = -49.21535 + 9.09988X_1 - 419.39680X_2 + 41.86507X_3 + 6.57000X_1X_2 - 0.20800X_1X_3 + 50.35000X_2X_3 - 0.15282X_1^2 - 0.74149X_2^2 - 8.00833X_3^2 \quad (7)$$

$$Y_{12} = 34.89227 - 1.22168X_1 - 63.96453X_2 - 0.97389X_3 + 0.39250X_1X_2 - 0.041750X_1X_3 + 3.88750X_2X_3 + 0.024247X_1^2 + 35.33872X_2^2 + 0.059938X_3^2 \quad (8)$$

$$Y_{21} = -42.94738 + 8.32950X_1 - 496.48838X_2 + 53.53507X_3 + 11.36500X_1X_2 + 0.040500X_1X_3 + 19.80000X_2X_3 - 0.19006X_1^2 + 56.76383X_2^2 - 8.99421X_3^2 \quad (9)$$

$$Y_{22} = 11.01348 - 0.35045X_1 - 7.33435X_2 - 0.53907X_3 - 1.71500X_1X_2 + 0.059000X_1X_3 - 7.10000X_2X_3 + 0.017294X_1^2 + 80.71105X_2^2 + 0.24673X_3^2 \quad (10)$$

$$Y_{31} = 102.08422 + 11.46552X_1 - 628.33280X_2 - 19.15722X_3 + 12.20000X_1X_2 + 0.53200X_1X_3 + 33.62500X_2X_3 - 0.29956X_1^2 + 105.10572X_2^2 - 1.64125X_3^2 \quad (11)$$

$$Y_{32} = 30.88023 - 1.12398X_1 - 41.55950X_2 - 1.53577X_3 + 0.87750X_1X_2 + 0.11375X_1X_3 - 0.43750X_2X_3 + 9.51566 \times 10^{-3}X_1^2 + 8.23281X_2^2 - 0.19875X_3^2 \quad (12)$$

$$Y_{41} = -71.25701 + 8.72601X_1 - 193.65779X_2 + 27.07282X_3 + 6.71500X_1X_2 + 0.15600X_1X_3 + 27.47500X_2X_3 - 0.17334X_1^2 - 143.60835X_2^2 - 5.97217X_3^2 \quad (13)$$

$$Y_{42} = 22.23053 - 0.87028X_1 - 22.91247X_2 - 1.37271X_3 - 0.030000X_1X_2 + 0.029500X_1X_3 - 1.60000X_2X_3 + 0.015959X_1^2 + 23.81168X_2^2 + 0.17978X_3^2 \quad (14)$$

where,  $Y_{ki}$  are the responses ( $k = 1$  is PHE,  $k = 2$  represents ANT,  $k = 3$  is FLU,  $k = 4$  represents PYR;  $i = 1$  denotes extraction efficiency,  $i = 2$  represents the enrichment factor).

**Supplementary Table S1.** Analysis of variance regression equation.

| <b>Object</b>   | <b>Source</b> | <b>Sum of Squares</b> | <b>df</b> | <b>Mean Square</b> | <b>F Value</b> | <b>p-value Prob&gt;F</b> |                 |
|-----------------|---------------|-----------------------|-----------|--------------------|----------------|--------------------------|-----------------|
| Y <sub>11</sub> | Model         | 3329.45               | 9         | 369.94             | 66.7           | < 0.0001                 | significant     |
|                 | Residual      | 55.46                 | 10        | 5.55               |                |                          |                 |
|                 | Lack of Fit   | 25.57                 | 5         | 5.11               | 0.86           | 0.5659                   | not significant |
|                 | Pure Error    | 29.89                 | 5         | 5.98               |                |                          |                 |
|                 | Cor Total     | 3384.91               | 19        |                    |                |                          |                 |
| Y <sub>21</sub> | Model         | 3521.15               | 9         | 391.24             | 65.28          | < 0.0001                 | significant     |
|                 | Residual      | 59.93                 | 10        | 5.99               |                |                          |                 |
|                 | Lack of Fit   | 38.37                 | 5         | 7.67               | 1.78           | 0.2713                   | not significant |
|                 | Pure Error    | 21.57                 | 5         | 4.31               |                |                          |                 |
|                 | Cor Total     | 3581.08               | 19        |                    |                |                          |                 |
| Y <sub>31</sub> | Model         | 1904.3                | 9         | 211.59             | 68.31          | < 0.0001                 | significant     |
|                 | Residual      | 30.97                 | 10        | 3.1                |                |                          |                 |
|                 | Lack of Fit   | 25.14                 | 5         | 5.03               | 4.31           | 0.0674                   | not significant |
|                 | Pure Error    | 5.83                  | 5         | 1.17               |                |                          |                 |
|                 | Cor Total     | 1935.27               | 19        |                    |                |                          |                 |
| Y <sub>41</sub> | Model         | 2261.23               | 9         | 251.25             | 67.05          | < 0.0001                 | significant     |
|                 | Residual      | 37.47                 | 1         | 3.75               |                |                          |                 |

|                 |             |         |    |       |       |          |                 |
|-----------------|-------------|---------|----|-------|-------|----------|-----------------|
|                 |             |         | 0  |       |       |          |                 |
|                 | Lack of Fit | 17.99   | 5  | 3.6   | 0.92  | 0.534    | not significant |
|                 | Pure Error  | 19.49   | 5  | 3.9   |       |          |                 |
|                 | Cor Total   | 2298.71 | 19 |       |       |          |                 |
| Y <sub>12</sub> | Model       | 38.48   | 9  | 4.28  | 54.49 | < 0.0001 | significant     |
|                 | Residual    | 0.78    | 10 | 0.078 |       |          |                 |
|                 | Lack of Fit | 0.63    | 5  | 0.13  | 4.13  | 0.0728   | not significant |
|                 | Pure Error  | 0.15    | 5  | 0.031 |       |          |                 |
|                 | Cor Total   | 39.26   | 19 |       |       |          |                 |
| Y <sub>22</sub> | Model       | 44.42   | 9  | 4.94  | 69.26 | < 0.0001 | significant     |
|                 | Residual    | 0.71    | 10 | 0.071 |       |          |                 |
|                 | Lack of Fit | 0.41    | 5  | 0.082 | 1.35  | 0.375    | not significant |
|                 | Pure Error  | 0.3     | 5  | 0.061 |       |          |                 |
|                 | Cor Total   | 45.13   | 19 |       |       |          |                 |
| Y <sub>32</sub> | Model       | 38.52   | 9  | 4.28  | 154   | < 0.0001 | significant     |
|                 | Residual    | 0.28    | 10 | 0.028 |       |          |                 |
|                 | Lack of Fit | 0.21    | 5  | 0.042 | 3.18  | 0.1151   | not significant |
|                 | Pure Error  | 0.067   | 5  | 0.013 |       |          |                 |

|                 |                |          |        |          |       |          |                    |
|-----------------|----------------|----------|--------|----------|-------|----------|--------------------|
|                 | Cor            |          | 1      |          |       |          |                    |
|                 | Total          | 38.8     | 9      |          |       |          |                    |
| Y <sub>42</sub> | Model          | 22.9     | 9      | 2.54     | 69.68 | < 0.0001 | significant        |
|                 | Residual       | 0.37     | 1<br>0 | 0.037    |       |          |                    |
|                 | Lack of<br>Fit | 5.72E-03 | 5      | 1.14E-03 | 0.016 | 0.9998   | not<br>significant |
|                 | Pure<br>Error  | 0.36     | 5      | 0.072    |       |          |                    |
|                 | Cor            |          | 1      |          |       |          |                    |
|                 | Total          | 23.27    | 9      |          |       |          |                    |

---

Y<sub>ki</sub> is the responses(k=1 represents PHE,k=2 represents ANT,k=3 represents FLU,k=4 represents PYR;i=1 represents extraction efficiency,i=2 represents enrichment factor).

---

**Supplementary Table S2.** Recovery study and intra-day precision in real samples.

| Sample                    | Object antibiotics | Spiked antibiotics (ng mL <sup>-1</sup> ) | intraday precision (n=5) |         | intraday precision (n=7) |         |
|---------------------------|--------------------|-------------------------------------------|--------------------------|---------|--------------------------|---------|
|                           |                    |                                           | Recovery efficiency (E%) | RSD (%) | Recovery efficiency (E%) | RSD (%) |
| Water in Xiasantai River  | PHE                | 0                                         | ND                       |         | ND                       |         |
|                           |                    | 10                                        | 97.52                    | 0.23    | 98.01                    | 1.62    |
|                           |                    | 100                                       | 98.34                    | 0.56    | 98.72                    | 1.51    |
|                           |                    | 500                                       | 98.28                    | 1.28    | 97.97                    | 1.36    |
|                           |                    | 1000                                      | 98.16                    | 0.41    | 97.62                    | 1.17    |
|                           | ANT                | 0                                         | ND                       |         | ND                       |         |
|                           |                    | 10                                        | 97.71                    | 0.96    | 98.07                    | 0.11    |
|                           |                    | 100                                       | 98.29                    | 1.53    | 99.14                    | 1.02    |
|                           |                    | 500                                       | 98.52                    | 1.81    | 97.30                    | 0.69    |
|                           |                    | 1000                                      | 99.19                    | 1.42    | 98.54                    | 0.47    |
|                           | FLU                | 0                                         | ND                       |         | ND                       |         |
|                           |                    | 10                                        | 98.18                    | 2.14    | 98.26                    | 2.31    |
|                           |                    | 100                                       | 98.90                    | 1.69    | 99.04                    | 1.67    |
|                           |                    | 500                                       | 98.27                    | 1.58    | 98.47                    | 1.28    |
|                           |                    | 1000                                      | 97.71                    | 1.31    | 97.96                    | 1.23    |
|                           | PYR                | 0                                         | ND                       |         | ND                       |         |
|                           |                    | 10                                        | 99.23                    | 1.55    | 98.12                    | 1.55    |
|                           |                    | 100                                       | 98.01                    | 0.93    | 98.21                    | 0.45    |
|                           |                    | 500                                       | 98.95                    | 0.59    | 98.58                    | 0.93    |
|                           |                    | 1000                                      | 98.44                    | 1.88    | 98.70                    | 0.38    |
| Water in Tashan Reservoir | PHE                | 0                                         | ND                       |         | ND                       |         |
|                           |                    | 10                                        | 98.69                    | 1.26    | 97.20                    | 1.87    |
|                           |                    | 100                                       | 97.43                    | 2.33    | 96.96                    | 1.18    |
|                           |                    | 500                                       | 98.54                    | 1.59    | 96.12                    | 0.67    |
|                           |                    | 1000                                      | 98.13                    | 1.16    | 98.48                    | 0.12    |

|         |     |      |       |      |       |      |
|---------|-----|------|-------|------|-------|------|
| Topsoil | ANT | 0    | ND    |      | ND    |      |
|         |     | 10   | 97.81 | 0.32 | 96.71 | 1.21 |
|         |     | 100  | 97.46 | 1.81 | 97.71 | 0.26 |
|         |     | 500  | 98.09 | 2.04 | 97.85 | 0.84 |
|         |     | 1000 | 97.43 | 1.26 | 97.94 | 0.32 |
|         | FLU | 0    | ND    |      | ND    |      |
|         |     | 10   | 96.76 | 1.48 | 98.43 | 1.88 |
|         |     | 100  | 97.05 | 1.79 | 98.20 | 0.94 |
|         |     | 500  | 97.89 | 0.28 | 97.66 | 1.70 |
|         |     | 1000 | 98.32 | 1.93 | 97.53 | 1.43 |
|         | PYR | 0    | ND    |      | ND    |      |
|         |     | 10   | 98.62 | 1.69 | 97.95 | 1.15 |
|         |     | 100  | 98.39 | 1.52 | 99.30 | 0.11 |
|         |     | 500  | 98.42 | 1.17 | 99.11 | 0.75 |
|         |     | 1000 | 97.52 | 0.83 | 98.82 | 1.78 |
|         | PHE | 0    | ND    |      | ND    |      |
|         |     | 10   | 99.25 | 1.03 | 98.09 | 0.12 |
|         |     | 100  | 98.86 | 0.68 | 98.70 | 1.10 |
|         |     | 500  | 98.75 | 1.13 | 99.23 | 0.61 |
|         |     | 1000 | 98.92 | 1.48 | 99.22 | 1.73 |
|         | ANT | 0    | ND    |      | ND    |      |
|         |     | 10   | 97.94 | 1.91 | 98.34 | 1.27 |
|         |     | 100  | 98.52 | 0.77 | 98.19 | 0.24 |
|         |     | 500  | 99.61 | 1.37 | 98.30 | 1.79 |
|         |     | 1000 | 99.26 | 1.82 | 98.77 | 2.11 |
|         | FLU | 0    | ND    |      | ND    |      |
|         |     | 10   | 97.72 | 0.73 | 97.67 | 1.40 |
|         |     | 100  | 99.51 | 0.67 | 99.13 | 0.98 |
|         |     | 500  | 98.93 | 1.19 | 98.02 | 1.59 |

|         |     |      |       |      |       |      |
|---------|-----|------|-------|------|-------|------|
| Subsoil | PYR | 1000 | 98.50 | 0.91 | 98.44 | 1.41 |
|         |     | 0    | ND    |      | ND    |      |
|         |     | 10   | 99.07 | 1.01 | 98.49 | 1.18 |
|         |     | 100  | 98.22 | 1.39 | 98.27 | 0.58 |
|         |     | 500  | 97.62 | 0.42 | 97.56 | 0.87 |
|         | PHE | 1000 | 98.30 | 1.29 | 98.07 | 0.62 |
|         |     | 0    | ND    |      | ND    |      |
|         |     | 10   | 97.78 | 2.07 | 97.94 | 1.89 |
|         |     | 100  | 98.39 | 1.44 | 99.07 | 1.47 |
|         |     | 500  | 97.47 | 1.89 | 97.54 | 0.24 |
|         | ANT | 1000 | 98.44 | 0.71 | 98.41 | 2.45 |
|         |     | 0    | ND    |      | ND    |      |
|         |     | 10   | 99.21 | 0.92 | 99.84 | 1.52 |
|         |     | 100  | 98.70 | 1.21 | 98.62 | 0.51 |
|         |     | 500  | 97.76 | 0.23 | 97.34 | 1.05 |
|         | FLU | 1000 | 98.73 | 1.74 | 98.11 | 0.47 |
|         |     | 0    | ND    |      | ND    |      |
|         |     | 10   | 97.68 | 0.91 | 98.50 | 1.24 |
|         |     | 100  | 98.95 | 1.54 | 97.79 | 0.67 |
|         |     | 500  | 98.50 | 0.48 | 98.66 | 1.69 |
|         | PYR | 1000 | 98.37 | 1.65 | 97.45 | 1.13 |
|         |     | 0    | ND    |      | ND    |      |
|         |     | 10   | 99.23 | 1.14 | 98.41 | 0.72 |
|         |     | 100  | 98.83 | 1.81 | 97.76 | 1.38 |
|         |     | 500  | 98.04 | 0.58 | 98.65 | 0.58 |
|         |     | 1000 | 97.71 | 1.33 | 98.22 | 1.42 |

---

ND: not found.

**Supplementary Table S3.** Recovery study and intra-day precision in real samples.

| Sample                    | Object antibiotics | Spiked antibiotics (pg mL <sup>-1</sup> ) | intraday precision (n=5) |          | intraday precision (n=7) |          |
|---------------------------|--------------------|-------------------------------------------|--------------------------|----------|--------------------------|----------|
|                           |                    |                                           | Recovery efficiency (E%) | RS D (%) | Recovery efficiency (E%) | RS D (%) |
| Water in Xiasantai River  | SDZ                | 0                                         | ND                       |          | ND                       |          |
|                           |                    | 10                                        | 96.22                    | 1.19     | 97.10                    | 0.92     |
|                           |                    | 100                                       | 97.53                    | 1.59     | 98.15                    | 2.06     |
|                           |                    | 500                                       | 98.27                    | 1.94     | 98.79                    | 1.03     |
|                           |                    | 1000                                      | 98.31                    | 1.37     | 99.01                    | 1.25     |
|                           | SMT                | 0                                         | ND                       |          | ND                       |          |
|                           |                    | 10                                        | 97.44                    | 3.06     | 97.55                    | 2.51     |
|                           |                    | 100                                       | 98.50                    | 2.24     | 98.27                    | 1.29     |
|                           |                    | 500                                       | 96.68                    | 1.73     | 97.64                    | 2.28     |
|                           |                    | 1000                                      | 97.91                    | 1.67     | 97.08                    | 1.93     |
| Water in Tashan Reservoir | SDZ                | 0                                         | ND                       |          | ND                       |          |
|                           |                    | 10                                        | 97.63                    | 2.50     | 99.40                    | 1.32     |
|                           |                    | 100                                       | 98.40                    | 1.60     | 97.66                    | 2.06     |
|                           |                    | 500                                       | 97.84                    | 0.94     | 97.89                    | 2.42     |
|                           |                    | 1000                                      | 97.33                    | 1.23     | 98.55                    | 1.91     |
|                           | SMT                | 0                                         | ND                       |          | ND                       |          |
|                           |                    | 10                                        | 97.99                    | 1.22     | 98.06                    | 2.26     |
|                           |                    | 100                                       | 97.76                    | 1.40     | 96.81                    | 2.04     |
|                           |                    | 500                                       | 97.79                    | 0.97     | 97.91                    | 1.59     |
|                           |                    | 1000                                      | 98.27                    | 0.69     | 97.50                    | 1.80     |
| Milk                      | SDZ                | 0                                         | ND                       |          | ND                       |          |



|     |     |      |       |      |       |      |
|-----|-----|------|-------|------|-------|------|
| Egg | SMT | 10   | 97.49 | 2.08 | 96.14 | 1.64 |
|     |     | 100  | 97.58 | 0.66 | 96.43 | 0.41 |
|     |     | 500  | 97.95 | 1.28 | 97.26 | 1.16 |
|     |     | 1000 | 98.07 | 0.57 | 97.69 | 0.49 |
|     |     | 0    | ND    | ND   |       |      |
|     |     | 10   | 96.58 | 1.56 | 98.59 | 2.84 |
|     |     | 100  | 96.34 | 1.34 | 97.38 | 2.26 |
|     |     | 500  | 96.71 | 1.05 | 98.32 | 2.12 |
|     |     | 1000 | 97.85 | 0.74 | 97.81 | 1.77 |
|     |     | 0    | ND    | ND   |       |      |
|     | SDZ | 10   | 97.18 | 1.99 | 97.32 | 0.49 |
|     |     | 100  | 96.84 | 2.39 | 98.66 | 2.42 |
|     |     | 500  | 97.46 | 0.44 | 98.47 | 2.71 |
|     |     | 1000 | 96.81 | 2.57 | 97.59 | 1.71 |
|     |     | 0    | ND    | ND   |       |      |
|     |     | 10   | 97.80 | 2.08 | 96.09 | 1.71 |
|     |     | 100  | 97.57 | 1.28 | 97.08 | 3.09 |
|     |     | 500  | 97.03 | 0.84 | 97.22 | 2.13 |
|     |     | 1000 | 96.90 | 2.51 | 97.31 | 1.58 |

---

ND: not found.
